# Supplementary material
Source: PubMed Central journal article supplement (PMC2860635)
Supplement: NIHMS193607-supplement-1_si_001.pdf [file NIHMS193607-supplement-1_si_001.pdf]

Supplementary Information for

Biochemical and Structural Characterization of *Mycobacterium tuberculosis*

$\beta$ -Lactamase (BlaC) with the Carbapenem Class of  $\beta$ -lactams

Lee W. Tremblay<sup>#</sup>, Fan Fan<sup>#</sup> and John S Blanchard<sup>‡\*</sup>

Department of Biochemistry, Albert Einstein College of Medicine, 1300 Morris Park

Avenue, Bronx, New York 10461

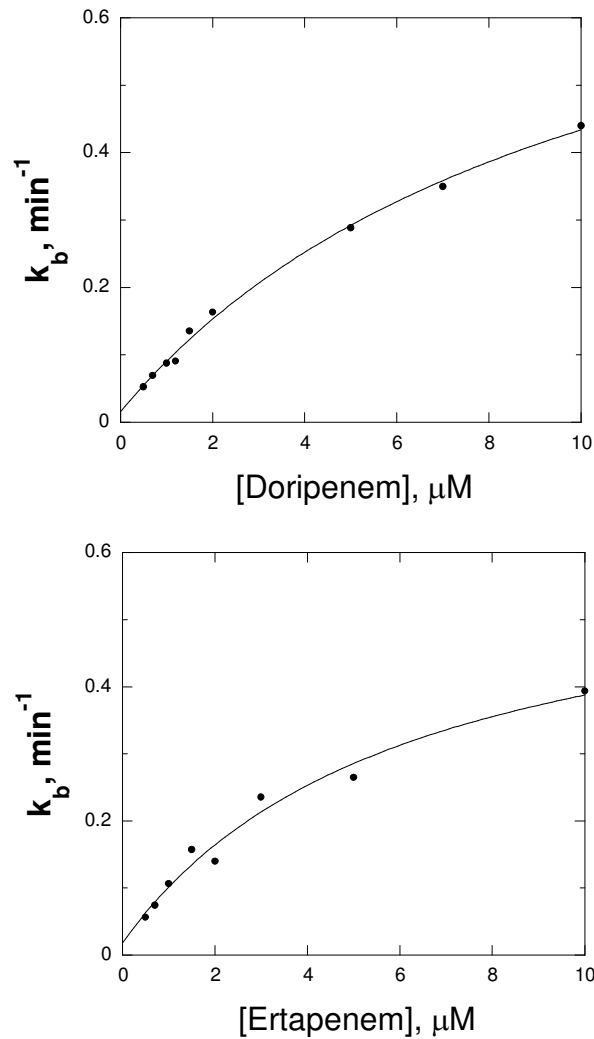

**Figure S1.** Rate constant ( $k_b$ ) as a function of the concentration of doripenem (upper panel) and ertapenem (bottom panel) with nitrocefin as a substrate. The doripenem concentrations are 0.5, 0.7, 1, 1.2, 1.5, 2, 5, 7, 10  $\mu$ M; the ertapenem concentrations are 0.5, 0.7, 1, 1.5, 2, 3, 5, 10  $\mu$ M.
